# Supplementary material for: The impact of a demand-side sanitation and hygiene promotion intervention on sustained behavior change and health in Amhara, Ethiopia: A cluster-randomized trial
Source: PubMed Central journal article supplement (PMC10021625; doi:10.1371/journal.pgph.0000056), 2022-01-07
Supplement: pgph.0000056.s001.pdf [file pgph.0000056.s001.pdf]

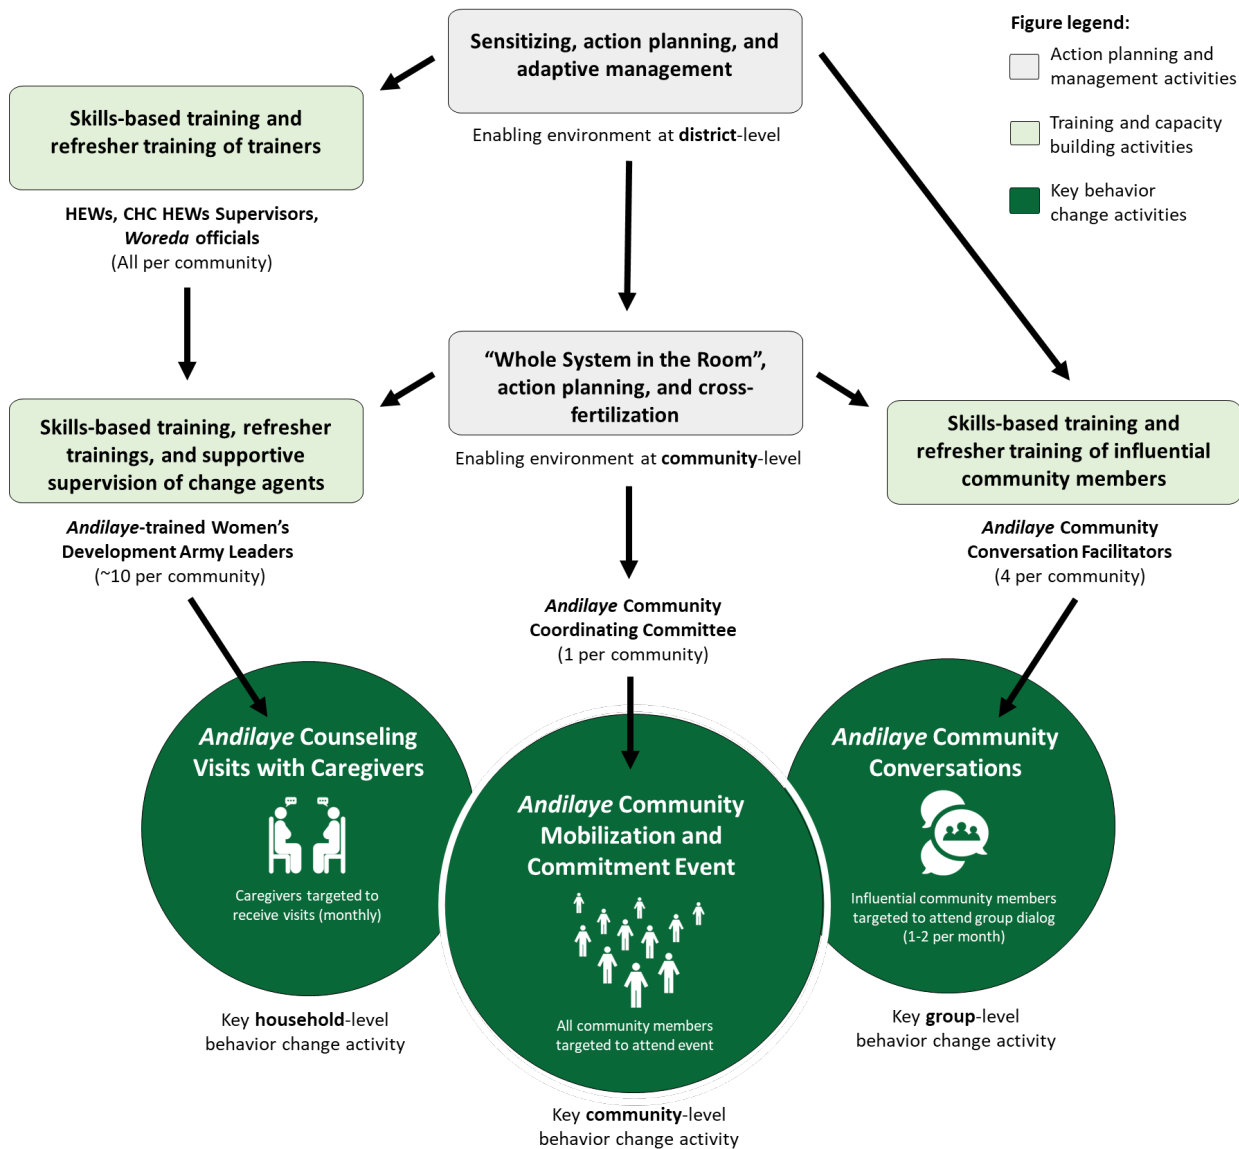

**Supplemental Figure 1.** Diagram summarizing the *Andilaye* intervention
