# Supplementary material for: The impact of a demand-side sanitation and hygiene promotion intervention on sustained behavior change and health in Amhara, Ethiopia: A cluster-randomized trial
Source: PubMed Central journal article supplement (PMC10021625; doi:10.1371/journal.pgph.0000056), 2022-01-07
Supplement: pgph.0000056.s005.pdf [file pgph.0000056.s005.pdf]

**Supplemental Table 4. Andilaye Trial indicators used to assess WASH behavior**

| Indicators                                                                                                        | Overall |      | Intervention |      | Control |      | PR (95% CI) <sup>a</sup>    | PD (95% CI) <sup>b</sup>    |
|-------------------------------------------------------------------------------------------------------------------|---------|------|--------------|------|---------|------|-----------------------------|-----------------------------|
|                                                                                                                   | N       | %    | N            | %    | N       | %    |                             |                             |
| <b>Sanitation</b>                                                                                                 |         |      |              |      |         |      |                             |                             |
| <b>Household latrine coverage</b>                                                                                 |         |      |              |      |         |      |                             |                             |
| Households with at least one latrine                                                                              | 1472    | 61.6 | 743          | 61.2 | 729     | 62.0 | 0.99 (0.82, 1.21)           | 0.00 (-0.12, 0.12)          |
| Households with improved latrine                                                                                  | 1467    | 32.5 | 741          | 34.6 | 726     | 30.3 | 1.13 (0.81, 1.59)           | 0.04 (-0.07, 0.15)          |
| Households with latrine with smooth and cleanable slab/floor                                                      | 1471    | 14.8 | 743          | 16.3 | 728     | 13.3 | 1.19 (0.70, 2.03)           | 0.03 (-0.05, 0.11)          |
| Households with fully constructed latrine                                                                         | 1471    | 30.9 | 742          | 33.0 | 729     | 28.7 | 1.15 (0.86, 1.54)           | 0.04 (-0.46, 0.13)          |
| Percent of household latrines that were fully constructed                                                         | 906     | 50.1 | 454          | 53.4 | 452     | 46.2 | <b>1.18 (1.01, 1.38)</b>    | <b>0.08 (0.01, 0.16)</b>    |
| <b>Household latrine characteristics</b>                                                                          |         |      |              |      |         |      |                             |                             |
| Stagnant water present over the floor / latrine slab                                                              | 906     | 17.0 | 455          | 16.3 | 451     | 17.7 | 0.92 (0.66, 1.28)           | -0.01 (-0.07, 0.04)         |
| Pan, slab, or floor was discolored (e.g., yellow, green)                                                          | 904     | 59.7 | 454          | 58.4 | 450     | 61.1 | 0.97 (0.88, 1.08)           | -0.02 (-0.08, 0.04)         |
| Presence of flies in latrine                                                                                      | 906     | 83.2 | 455          | 81.8 | 451     | 84.7 | 0.97 (0.89, 1.06)           | -0.02 (-0.95, 0.05)         |
| Presence of drop hole cover in the latrine                                                                        | 906     | 14.1 | 455          | 18.2 | 451     | 10.0 | <b>1.77 (1.19, 2.63)</b>    | <b>0.08 (0.02, 0.14)</b>    |
| Among those with a drop hole, a cover was situated over drop hole                                                 | 130     | 67.7 | 85           | 70.6 | 45      | 62.2 | 1.09 (0.88, 1.36)           | 0.06 (-0.08, 0.20)          |
| Presence of cleaning agents for washing latrine                                                                   | 906     | 5.7  | 455          | 8.4  | 451     | 3.1  | 2.46 (0.76, 7.96)           | 0.04 (-0.02, 0.11)          |
| Presence of feces on floor / slab or other place in the latrine                                                   | 906     | 50.6 | 455          | 50.1 | 451     | 51.0 | 1.02 (0.90, 1.15)           | 0.01 (-0.05, 0.07)          |
| Evidence latrine is used for storage or other non-sanitation-related purpose                                      | 906     | 7.6  | 455          | 7.7  | 451     | 7.5  | 0.93 (0.49, 1.75)           | -0.01 (-0.05, 0.04)         |
| Presence of well-worn path to latrine                                                                             | 906     | 95.1 | 455          | 95.4 | 451     | 94.9 | 1.01 (0.97, 1.05)           | 0.00 (-0.03, 0.04)          |
| Presence of fresh feces on / in the pit or pan                                                                    | 906     | 73.3 | 455          | 73.6 | 451     | 73.0 | 1.01 (0.90, 1.12)           | 0.00 (-0.07, 0.08)          |
| Pit is full or close to being full                                                                                | 905     | 12.2 | 454          | 11.7 | 451     | 12.6 | 0.92 (0.57, 1.49)           | -0.01 (-0.68, 0.05)         |
| Presence of anal cleansing item inside or near latrine                                                            | 906     | 40.3 | 455          | 39.1 | 451     | 41.5 | 0.93 (0.77, 1.12)           | -0.03 (-1.02, 0.04)         |
| Presence of odor from stool or urine in the latrine                                                               | 906     | 84.0 | 455          | 81.8 | 451     | 86.3 | 0.96 (0.87, 1.04)           | -0.04 (-0.11, 0.04)         |
| Presence of leaves, spider webs, rubbish, other dirt in latrine                                                   | 906     | 20.3 | 455          | 18.5 | 451     | 22.2 | 0.85 (0.60, 1.12)           | -0.03 (-0.11, 0.04)         |
| Wet latrine floor                                                                                                 | 906     | 43.8 | 455          | 40.7 | 451     | 47.0 | 0.85 (0.68, 1.07)           | -0.07 (-0.16, 0.03)         |
| Presence of water available near or inside latrine for hand washing                                               | 906     | 12.3 | 455          | 18.0 | 451     | 6.4  | <b>2.28 (1.08, 4.81)</b>    | 0.09 (-0.01, 0.18)          |
| Presence of cleansing agent near or inside latrine for hand washing                                               | 905     | 2.8  | 454          | 5.3  | 451     | 0.2  | <b>21.67 (2.17, 215.98)</b> | 0.07 (-0.04, 0.18)          |
| Water available inside or near latrine for flushing or self-cleansing                                             | 906     | 4.5  | 455          | 6.6  | 451     | 2.4  | <b>2.35 (1.05, 5.28)</b>    | 0.04 (-0.01, 0.08)          |
| <b>Household latrine facility operation and maintenance</b>                                                       |         |      |              |      |         |      |                             |                             |
| Latrine cleaned during the last seven days                                                                        | 904     | 23.2 | 454          | 25.6 | 450     | 20.9 | 1.02 (0.65, 1.60)           | 0.00 (-0.95, 1.03)          |
| Household has added or improved anything on this latrine since its original construction                          | 899     | 16.5 | 453          | 17.2 | 446     | 15.7 | 1.08 (0.71, 1.65)           | 0.01 (-0.06, 0.08)          |
| Have ever fixed anything that became broken, damaged, or worn out on this latrine since its original construction | 900     | 23.1 | 453          | 23.4 | 447     | 22.8 | 1.02 (0.76, 1.37)           | 0.00 (-0.06, 0.07)          |
| Is your latrine facility working (operating) correctly now?                                                       | 907     | 93.4 | 455          | 94.1 | 452     | 92.7 | 1.02 (0.98, 1.05)           | 0.01 (-0.02, 0.05)          |
| Facility observed to require obvious repair                                                                       | 906     | 75.3 | 455          | 70.1 | 451     | 80.5 | <b>0.88 (0.78, 0.99)</b>    | <b>-0.10 (-0.19, -0.01)</b> |
| The latrine was observed to be serviceable                                                                        | 906     | 78.8 | 455          | 80.0 | 451     | 77.6 | 1.05 (0.93, 1.18)           | 0.04 (-0.05, 0.13)          |
| Cleaning agents for washing latrine were observed inside or near the latrine                                      | 906     | 5.7  | 455          | 8.4  | 451     | 3.1  | 2.46 (0.76, 7.96)           | 0.04 (-0.03, 0.11)          |

|                                                                                                                                                       |          |                  |          |                  |          |                  |                                |                                        |
|-------------------------------------------------------------------------------------------------------------------------------------------------------|----------|------------------|----------|------------------|----------|------------------|--------------------------------|----------------------------------------|
| Presence of feces on floor, slab, or other place in the latrine aside from the pit                                                                    | 906      | 50.1             | 455      | 50.1             | 451      | 51.0             | 1.02 (0.90, 1.15)              | 0.01 (-0.05, 0.07)                     |
| <b>Latrine utilization</b>                                                                                                                            | <b>N</b> | <b>mean (SE)</b> | <b>N</b> | <b>mean (SE)</b> | <b>N</b> | <b>mean (SE)</b> | -                              | <b>difference (95% CI)<sup>e</sup></b> |
| Given you have a latrine, number of households that used this household latrine in last 7 days                                                        | 905      | 1.63 (0.09)      | 454      | 1.54 (0.09)      | 451      | 1.72 (0.14)      | -                              | -0.11 (-0.42, 0.19)                    |
| Given household has a latrine, number of people who used this latrine from another household during last 7 days, not including your household members | 902      | 0.91 (0.14)      | 454      | 0.70 (0.16)      | 448      | 1.11 (0.22)      | -                              | -0.40 (-0.85, 0.05)                    |
|                                                                                                                                                       | <b>N</b> | <b>%</b>         | <b>N</b> | <b>%</b>         | <b>N</b> | <b>%</b>         | <b>PR (95% CI)<sup>a</sup></b> | <b>PD (95% CI)<sup>b</sup></b>         |
| Given you have a latrine, household members have used this latrine for 3 or more days during the last 7 days                                          | 905      | 90.8             | 455      | 92.1             | 450      | 89.6             | 1.04 (0.99, 1.10)              | 0.04 (-0.13, 0.09)                     |
| Respondent defecated in any latrine during last 2 days                                                                                                | 1469     | 45.5             | 740      | 45.8             | 729      | 45.3             | 1.01 (0.79, 1.29)              | 0.00 (-0.11, 0.12)                     |
| Respondent always exclusively used a latrine for defecation during last 7 days                                                                        | 1472     | 46.4             | 743      | 53.2             | 729      | 54.1             | 0.99 (0.79, 1.24)              | -0.00 (-0.12, 0.12)                    |
| Respondent's primary place of defecation changes over the course of the year                                                                          | 1470     | 27.3             | 742      | 28.8             | 728      | 25.7             | 1.16 (0.90, 1.50)              | 0.04 (-0.03, 0.11)                     |
| Head of household defecated in any latrine during last 2 days                                                                                         | 900      | 57.7             | 486      | 57.6             | 414      | 57.7             | 1.01 (0.83, 1.23)              | 0.01 (-0.11, 0.12)                     |
| Head of household always exclusively used a latrine for defecation during last 7 days                                                                 | 1002     | 34.8             | 529      | 36.5             | 473      | 33.0             | 1.07 (0.79, 1.47)              | 0.03 (-0.09, 0.15)                     |
| Head of household's primary place of defecation changes over the course of the year                                                                   | 1205     | 25.9             | 624      | 25.5             | 581      | 26.3             | 0.96 (0.71, 1.30)              | -0.01 (-0.09, 0.07)                    |
| Ages 4-17 defecated in any latrine during last 2 days                                                                                                 | 2991     | 52.1             | 1538     | 52.7             | 1453     | 51.2             | 1.01 (0.83, 1.20)              | 0.00 (-0.10, 0.11)                     |
| Ages 4-17 always exclusively used a latrine for defecation during last 7 days                                                                         | 2842     | 38.9             | 1447     | 42.6             | 1385     | 35.0             | 1.15 (0.89, 1.50)              | 0.06 (-0.05, 0.16)                     |
| Ages 4-17 primary place of defecation changes over the course of the year                                                                             | 3532     | 23.5             | 1778     | 24.5             | 1754     | 22.4             | 1.08 (0.83, 1.41)              | 0.02 (-0.05, 0.08)                     |
| Safely disposed of child feces                                                                                                                        | 777      | 38.9             | 401      | 36.7             | 376      | 41.2             | 0.96 (0.69, 1.32)              | -0.02 (-0.15, 0.11)                    |
| <b>Open defecation practices</b>                                                                                                                      |          |                  |          |                  |          |                  |                                |                                        |
| Respondent's primary place of defecation was OD during last 2 days                                                                                    | 1472     | 39.5             | 743      | 40.2             | 729      | 38.8             | 1.05 (0.76, 1.45)              | 0.02 (-0.11, 0.15)                     |
| Respondent openly defecated during last 2 days                                                                                                        | 1472     | 44.9             | 743      | 45.2             | 729      | 44.9             | 1.03 (0.78, 1.36)              | 0.01 (-0.11, 0.14)                     |
| Respondent openly defecated in or near surface water                                                                                                  | 660      | 10.9             | 335      | 10.2             | 325      | 11.7             | 0.93 (0.50, 1.72)              | -0.01 (-0.08, 0.06)                    |
| Respondent urinated in/or near surface water                                                                                                          | 1466     | 7.2              | 739      | 6.5              | 727      | 8.0              | 0.82 (0.46, 1.48)              | -0.01 (-0.06, 0.03)                    |
| Head of household's primary place of defecation was OD during last 2 days                                                                             | 1146     | 40.3             | 600      | 39.7             | 546      | 41.0             | 0.95 (0.68, 1.31)              | -0.02 (-0.15, 0.11)                    |
| Head of household openly defecated during last 2 days                                                                                                 | 992      | 64.7             | 527      | 62.6             | 465      | 67.1             | 0.98 (0.80, 1.21)              | -0.01 (-0.14, 0.12)                    |
| Head of household openly defecated in or near surface water during last 2 days                                                                        | 371      | 12.4             | 199      | 11.6             | 172      | 13.3             | 1.07 (0.48, 2.40)              | 0.01 (-0.09, 0.10)                     |
| Head of household urinated in/near surface water                                                                                                      | 704      | 7.7              | 387      | 6.7              | 317      | 8.8              | 0.82 (0.35, 1.94)              | -0.01 (-0.08, 0.05)                    |
| Ages 4-17 primary place of defecation was OD during last 2 days                                                                                       | 3494     | 44.3             | 1757     | 42.9             | 1737     | 45.7             | 0.97 (0.72, 1.29)              | -0.01 (-0.14, 0.11)                    |
| Ages 4-17 openly defecated during last 2 days                                                                                                         | 2921     | 58.8             | 1489     | 55.2             | 1432     | 62.6             | 0.95 (0.77, 1.16)              | -0.03 (-0.15, 0.09)                    |
| Ages 4-17 openly defecated in or near surface water during last 2 days                                                                                | 1326     | 18.4             | 629      | 14.5             | 697      | 22.0             | 0.73 (0.39, 1.37)              | -0.05 (-0.17, 0.06)                    |

|                                                                                                                         |      |      |      |      |      |      |                          |                          |
|-------------------------------------------------------------------------------------------------------------------------|------|------|------|------|------|------|--------------------------|--------------------------|
| Ages 4-17 urinated in/near surface water                                                                                | 2480 | 11.7 | 1273 | 9.0  | 1207 | 14.5 | 0.66 (0.35, 1.24)        | -0.05 (-0.12, 0.03)      |
| Evidence of open defecation (i.e., human feces) in/near household compound                                              | 1472 | 45.2 | 743  | 43.5 | 729  | 47.1 | 0.95 (0.78, 1.15)        | -0.03 (-0.11, 0.06)      |
| <b>Personal hygiene</b>                                                                                                 |      |      |      |      |      |      |                          |                          |
| <b>Washing station coverage</b>                                                                                         |      |      |      |      |      |      |                          |                          |
| Reported HH hand or facewashing station(s)                                                                              | 1472 | 98.0 | 743  | 98.3 | 729  | 97.7 | 1.01 (0.99, 1.02)        | 0.01 (-0.01, 0.02)       |
| Observed HH hand or facewashing station(s) with water                                                                   | 1472 | 19.9 | 743  | 19.5 | 729  | 20.3 | 0.96 (0.72, 1.26)        | -0.01 (-0.06, 0.05)      |
| Observed HH hand or facewashing station(s) with soap (%)                                                                | 1472 | 2.2  | 743  | 2.6  | 729  | 1.9  | 1.34 (0.44, 4.13)        | 0.01 (-0.02, 0.04)       |
| <b>Handwashing practices</b>                                                                                            |      |      |      |      |      |      |                          |                          |
| Yesterday, the index child's hands were washed                                                                          | 1428 | 98.5 | 724  | 99.0 | 704  | 97.9 | <b>1.01 (1.00, 1.02)</b> | <b>0.01 (0.00, 0.02)</b> |
| The last time the index child's hands were washed, soap/ash/or soapy water used                                         | 1398 | 44.8 | 714  | 46.5 | 684  | 43.0 | 1.08 (0.89, 1.30)        | 0.03 (-0.05, 0.12)       |
| The last time the index child defecated, he/she cleaned hands with water and soap, soapy water, or ash                  | 1410 | 41.8 | 713  | 43.9 | 697  | 39.6 | 1.12 (0.92, 1.35)        | 0.05 (-0.04, 0.13)       |
| Yesterday, the respondent washed his/her hands with water                                                               | 1469 | 98.0 | 742  | 98.3 | 727  | 97.8 | 1.01 (0.99, 1.02)        | 0.01 (-0.01, 0.02)       |
| The last time the respondent washed he/she used soap/ash/soapy water                                                    | 1468 | 44.0 | 740  | 46.0 | 728  | 42.0 | 1.09 (0.91, 1.31)        | 0.04 (-0.04, 0.12)       |
| The last time the respondent defecated, he/she cleaned hands with water and soap                                        | 1463 | 49.0 | 738  | 51.9 | 725  | 46.1 | 1.13 (0.94, 1.35)        | 0.06 (-0.03, 0.15)       |
| The last time the respondent prepared food, he/she cleaned hands with water and soap before beginning food preparations | 1403 | 51.0 | 700  | 53.6 | 703  | 48.5 | 1.11 (0.95, 1.29)        | 0.05 (-0.03, 0.13)       |
| <b>Hand cleanliness</b>                                                                                                 |      |      |      |      |      |      |                          |                          |
| Respondent's finger nails clean on left hand                                                                            | 1472 | 73.6 | 743  | 74.6 | 729  | 72.7 | 1.03 (0.96, 1.11)        | 0.02 (-0.03, 0.08)       |
| Respondent's finger nail clean on right hand                                                                            | 1472 | 73.4 | 743  | 73.6 | 729  | 73.1 | 1.01 (0.94, 1.09)        | 0.01 (-0.04, 0.65)       |
| Respondent's finger pads clean on left hand                                                                             | 1472 | 62.1 | 743  | 63.3 | 729  | 60.9 | 1.05 (0.95, 1.15)        | 0.03 (-0.03, 0.09)       |
| Respondent's Finger pads clean on right hand                                                                            | 1472 | 62.2 | 743  | 62.7 | 729  | 61.7 | 1.03 (0.93, 1.13)        | 0.02 (-0.04, 0.08)       |
| Respondent's palm clean on left hand                                                                                    | 1472 | 57.5 | 743  | 59.0 | 729  | 56.1 | 1.05 (0.94, 1.18)        | 0.03 (-0.04, 0.09)       |
| Respondent's palm clean on right hand                                                                                   | 1472 | 57.9 | 743  | 59.1 | 729  | 56.6 | 1.05 (0.94, 1.17)        | 0.03 (-0.04, 0.09)       |
| Index child's finger nails clean on left hand                                                                           | 1024 | 84.1 | 502  | 83.3 | 522  | 84.9 | 0.96 (0.91, 1.02)        | -0.03 (-0.08, 0.14)      |
| Index child's finger nail clean on right hand                                                                           | 1024 | 83.9 | 502  | 83.1 | 522  | 84.7 | 0.96 (0.90, 1.02)        | -0.03 (-0.08, 0.02)      |
| Index child's finger pads clean on left hand                                                                            | 1024 | 80.6 | 502  | 79.9 | 522  | 81.2 | 0.98 (0.91, 1.05)        | -0.02 (-0.07, 0.03)      |
| Index child's finger pads clean on right hand                                                                           | 1024 | 80.4 | 502  | 79.7 | 522  | 81.0 | 0.98 (0.91, 1.05)        | -0.02 (-0.07, 0.03)      |
| Index child's palm clean on left hand                                                                                   | 1024 | 78.9 | 502  | 78.9 | 522  | 78.9 | 0.99 (0.93, 1.05)        | -0.01 (-0.06, 0.04)      |
| Index child's palm clean on right hand                                                                                  | 1024 | 78.6 | 502  | 78.5 | 522  | 78.7 | 0.98 (0.92, 1.05)        | -0.01 (-0.06, 0.04)      |
| <b>Facewashing practices</b>                                                                                            |      |      |      |      |      |      |                          |                          |
| Yesterday, the index child's face was cleaned                                                                           | 1433 | 98.1 | 723  | 97.9 | 710  | 98.3 | 0.99 (0.98, 1.01)        | -0.01 (-0.02, 0.01)      |
| Yesterday, after index child's face was washed it was it wiped dry with a cloth                                         | 1325 | 37.1 | 665  | 38.1 | 660  | 36.2 | 1.04 (0.90, 1.21)        | 0.02 (-0.04, 0.07)       |
| Yesterday, the respondent cleaned his/her face                                                                          | 1470 | 98.0 | 742  | 97.6 | 728  | 98.4 | 0.99 (0.97, 1.01)        | -0.01 (-0.03, 0.01)      |
| Yesterday, the respondent wiped his/her face dry with a cloth such as a towel or apron                                  | 1393 | 39.1 | 702  | 40.9 | 691  | 37.3 | 1.09 (0.09, 1.27)        | 0.03 (-0.03, 0.10)       |
| <b>Face cleanliness</b>                                                                                                 |      |      |      |      |      |      |                          |                          |

|                                                                                    |          |                  |          |                  |          |                  |                   |                                        |
|------------------------------------------------------------------------------------|----------|------------------|----------|------------------|----------|------------------|-------------------|----------------------------------------|
| Ocular discharge is present (all children ages 1-9 years)                          | 1696     | 28.7             | 822      | 26.9             | 874      | 30.4             | 0.88 (0.68, 1.15) | -0.04 (-0.11, 0.04)                    |
| Wet nasal discharge is present (all children ages 1-9 years)                       | 1696     | 38.2             | 822      | 37.0             | 874      | 39.4             | 0.94 (0.78, 1.13) | -0.02 (-0.09, 0.05)                    |
| Dry nasal discharge is present (all children ages 1-9 years)                       | 1696     | 44.0             | 822      | 42.7             | 874      | 45.2             | 0.97 (0.81, 1.16) | -0.02 (-0.10, 0.06)                    |
| Dirt/dust/other debris is present (all children ages 1-9 years)                    | 1696     | 50.0             | 822      | 50.5             | 874      | 49.5             | 1.03 (0.89, 1.20) | 0.02 (-0.06, 0.09)                     |
| Ocular discharge is present (index child)                                          | 1024     | 29.8             | 502      | 27.5             | 522      | 32.0             | 0.88 (0.68, 1.15) | -0.04 (-0.11, 0.04)                    |
| Wet nasal discharge is present (index child)                                       | 1024     | 39.8             | 502      | 37.7             | 522      | 42.0             | 0.94 (0.78, 1.13) | -0.02 (-0.09, 0.05)                    |
| Dry nasal discharge is present (index child)                                       | 1024     | 45.6             | 502      | 43.2             | 522      | 47.9             | 0.97 (0.81, 1.16) | -0.02 (-0.05, 0.06)                    |
| Dirt/dust/other debris is present (index child)                                    | 1024     | 53.0             | 502      | 52.2             | 522      | 52.9             | 1.03 (0.89, 1.20) | 0.02 (-0.06, 0.09)                     |
|                                                                                    | <b>N</b> | <b>mean (SE)</b> | <b>N</b> | <b>mean (SE)</b> | <b>N</b> | <b>mean (SE)</b> |                   | <b>difference (95% CI)<sup>e</sup></b> |
| Number of times a fly land on the index child's face during a 1 minute observation | 1024     | 3.3 (0.21)       | 502      | 3.2 (0.33)       | 522      | 3.4 (0.26)       | -                 | -0.15 (-0.90, 0.60)                    |

---

#### Household environmental sanitation

| <b>Animal husbandry and hygiene practices</b>                                   | <b>N</b> | <b>%</b> | <b>N</b> | <b>%</b> | <b>N</b> | <b>%</b> | <b>PR (95% CI)<sup>a</sup></b> | <b>PD (95% CI)<sup>b</sup></b> |
|---------------------------------------------------------------------------------|----------|----------|----------|----------|----------|----------|--------------------------------|--------------------------------|
| Respondent has animal herding or other animal husbandry responsibilities        | 1472     | 87.4     | 743      | 88.3     | 729      | 86.4     | 1.02 (0.96, 1.09)              | 0.02 (-0.04, 0.07)             |
| Head of household has animal herding or other animal husbandry responsibilities | 1243     | 91.4     | 639      | 92.5     | 604      | 90.2     | 1.05 (0.99, 1.11)              | 0.04 (-0.01, 0.09)             |
| Observed animal feces present in the compound                                   | 1472     | 82.3     | 743      | 82.2     | 729      | 82.4     | 1.01 (0.92, 1.11)              | 0.01 (-0.07, 0.08)             |
| Animal feces/waste not left out in open in compound                             | 1472     | 53.8     | 743      | 56.4     | 729      | 51.2     | 1.10 (0.95, 1.28)              | 0.05 (-0.03, 0.13)             |
| <b>Solid waste management</b>                                                   |          |          |          |          |          |          |                                |                                |
| Solid waste was not observed to have been left out in the open                  | 1472     | 31.1     | 743      | 34.6     | 729      | 27.6     | 1.26 (0.93, 1.69)              | 0.07 (-0.02, 0.17)             |

---
